# Supplementary material for: Combined Treatment of Cancer Cells Using Allyl Palladium Complexes Bearing Purine-Based NHC Ligands and Molecules Targeting MicroRNAs miR-221-3p and miR-222-3p: Synergistic Effects on Apoptosis
Source: MDPI journal article supplement (doi:10.3390/pharmaceutics15051332), 2023-04-24
Supplement: s1 [file s1]

## Article

# Combined treatment of cancer cells using allyl palladium complexes bearing purine-based NHC ligands and molecules targeting microRNAs miR-221-3p and miR-222-3p: synergistic effects on apoptosis

Chiara Tupini<sup>1†</sup>, Matteo Zurlo<sup>1†</sup>, Jessica Gasparello<sup>1</sup>, Irene Lodi<sup>1</sup>, Alessia Finotti<sup>1,2</sup>, Thomas Scattolin<sup>3</sup>, Fabiano Visentin<sup>4</sup>, Roberto Gambari<sup>1,2\*</sup>, and Ilaria Lampronti<sup>1,2\*</sup>

<sup>1</sup> Department of Life Sciences and Biotechnology, Ferrara University, 44121 Ferrara, Italy; chiara.tupini@unife.it, matteo.zurlo@unife.it, irene01.lodi@student.unife.it, jessica.gasparello@unife.it, alessia.finotti@unife.it, gam@unife.it, lmi@unife.it

<sup>2</sup> Center of Innovative Therapies for Cystic Fibrosis (InnThera4CF) University of Ferrara, Italy; alessia.finotti@unife.it, gam@unife.it, lmi@unife.it

<sup>3</sup> Dipartimento di Scienze Chimiche, Università degli Studi di Padova, via Marzolo 1, 35131 Padova, Italy; thomas.scattolin@unive.it

<sup>4</sup> Dipartimento di Scienze Molecolari e Nanosistemi, Università Ca' Foscari, Campus Scientifico Via Torino 155, 30174 Venezia-Mestre, Italy; fvise@unive.it

\* Authors to whom correspondence should be addressed.

† These authors contributed equally to this work.

**Citation:** To be added by editorial staff during production.

Academic Editor: Firstname  
Lastname

Received: date  
Accepted: date  
Published: date

**Publisher's Note:** MDPI stays neutral with regard to jurisdictional claims in published maps and institutional affiliations.

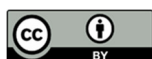

**Copyright:** © 2022 by the authors. Submitted for possible open access publication under the terms and conditions of the Creative Commons Attribution (CC BY) license (<https://creativecommons.org/licenses/by/4.0/>).

## SUPPLEMENTARY MATERIALS

## Supplementary Figures

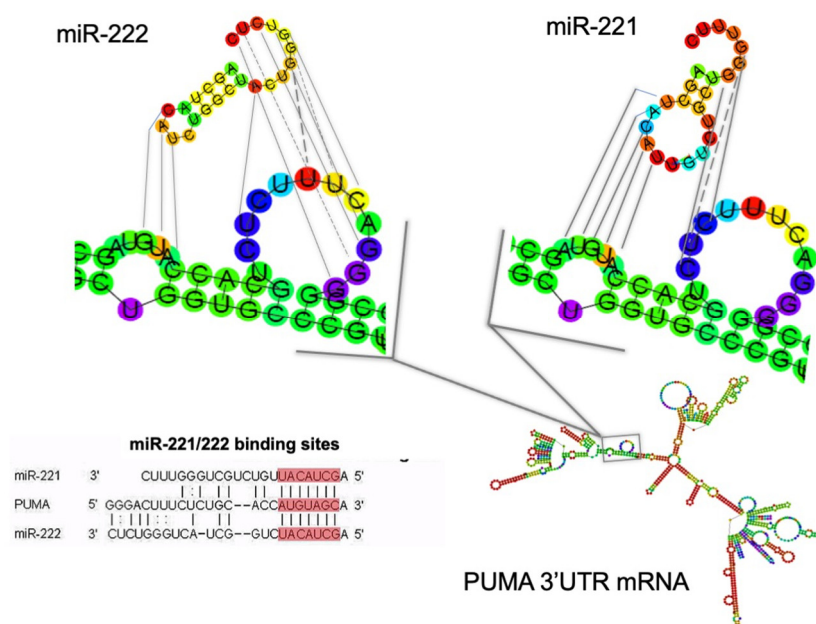

**Figure S1** - Structures of miR-221, miR-222 and the 3'-UTR sequence of human PUMA mRNA, showing the interactions between miR-221/miR-222 miRNAs and the PUMA 3'-UTR mRNA. In the lower panel, the base-pairing between miR-221, miR-222 and the miR-221/222 PUMA binding site is shown.

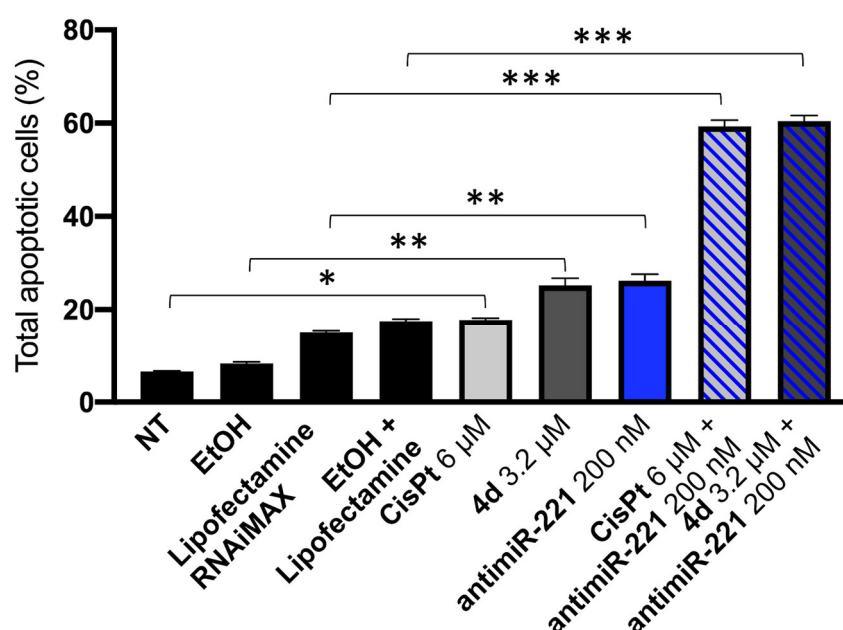

**Figure S2.** Total apoptotic cells percentage obtained from annexin-v staining after treatment of HT-29 cell line with CisPt and compound 4d in combination with antimir-221. Complete data set obtained from three different experiments, including each vehicle employed and showing comparisons evaluated for statistical analysis (ANOVA).  $p < 0.05$  (\*, significant),  $p < 0.01$  (\*\*; highly significant),  $p < 0.001$  (\*\*\*; highly significant).

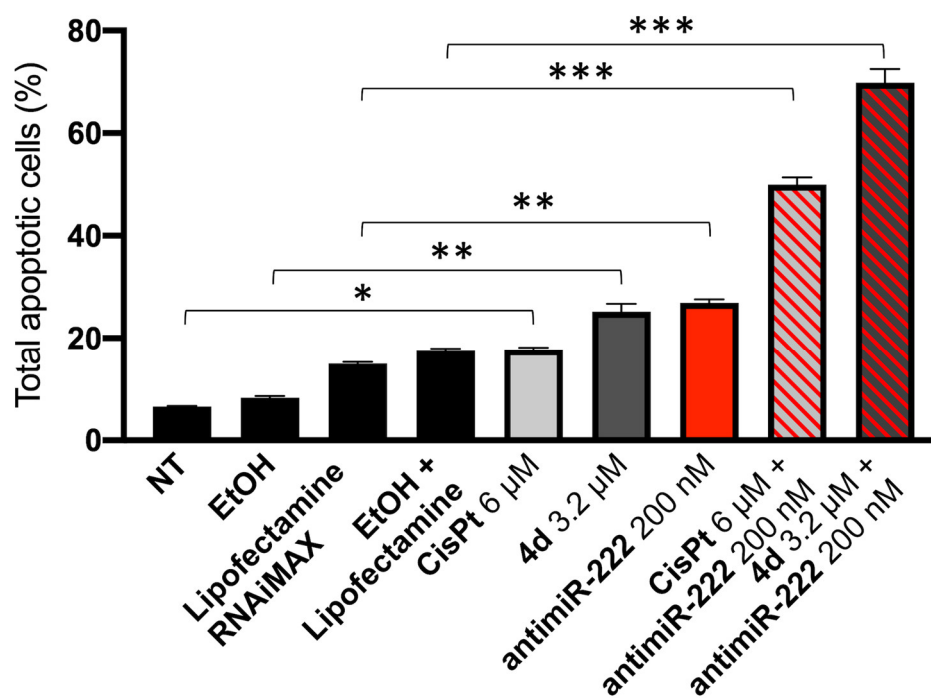

**Figure S3.** Total apoptotic cells percentage obtained from annexin-v staining after treatment of HT-29 cell line with CisPt and compound 4d in combination with antimir-222. Complete data set obtained from three different experiments, including each vehicle employed and showing comparisons evaluated for statistical analysis (ANOVA).  $p < 0.05$  (\*, significant),  $p < 0.01$  (\*\*; highly significant),  $p < 0.001$  (\*\*\*; highly significant).

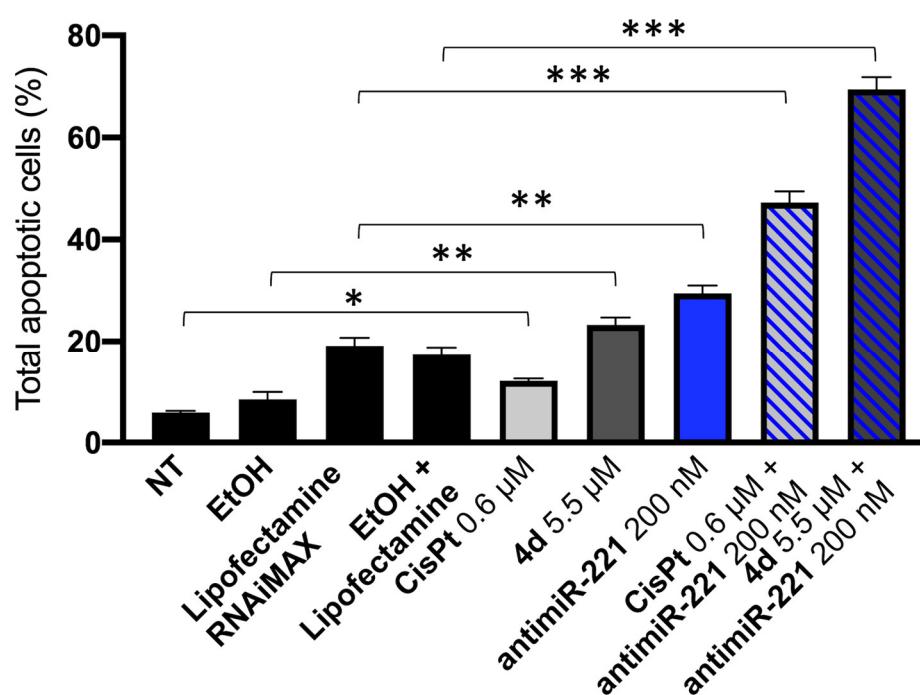

**Figure S4.** Total apoptotic cells percentage obtained from annexin-v staining after treatment of U251 cell line with CisPt and compound 4d in combination with antimir-221. Complete data set obtained from three different experiments, including each vehicle

employed and showing comparisons evaluated for statistical analysis (ANOVA).  $p < 0.05$  (\*, significant),  $p < 0.01$  (\*\*; highly significant),  $p < 0.001$  (\*\*\*; highly significant).

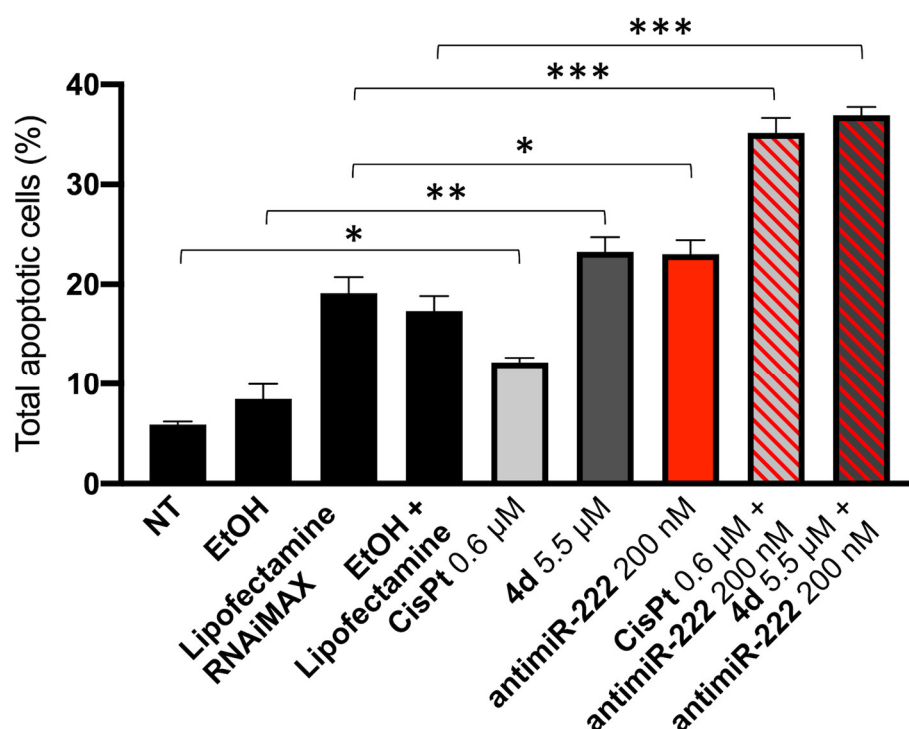

**Figure S5.** Total apoptotic cells percentage obtained from annexin-v staining after treatment of U251 cell line with CisPt and compound 4d in combination with antimir-222. Complete data set obtained from three different experiments, including each vehicle employed and showing comparisons evaluated for statistical analysis (ANOVA).  $p < 0.05$  (\*, significant),  $p < 0.01$  (\*\*; highly significant),  $p < 0.001$  (\*\*\*; highly significant).

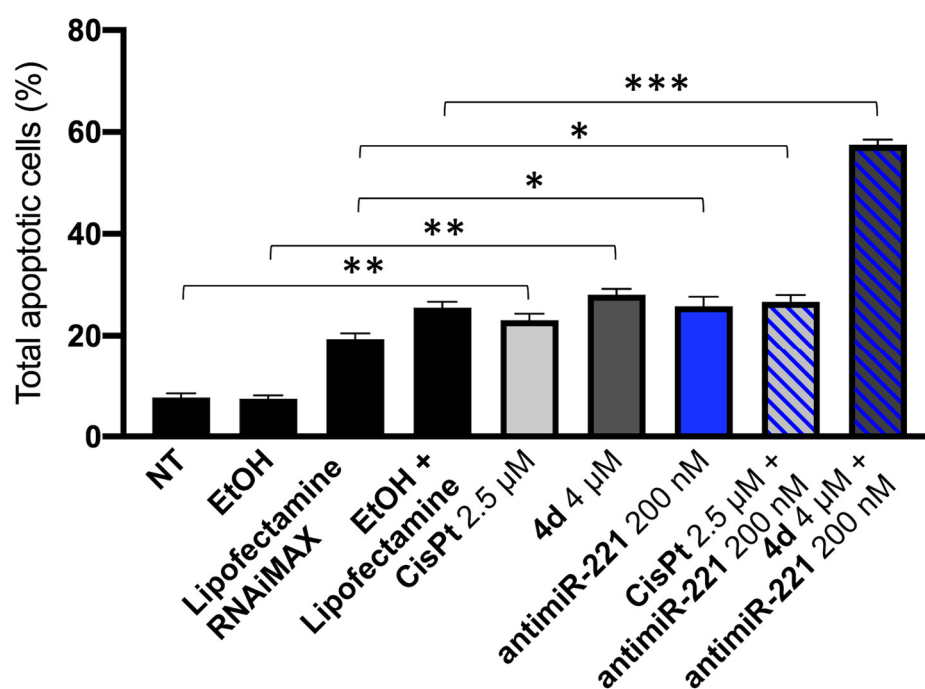

**Figure S6.** Total apoptotic cells percentage obtained from annexin-v staining after treatment of T98G cell line with CisPt and compound 4d in combination with antimir-221. Complete data set obtained from three different experiments, including each vehicle employed and showing comparisons evaluated for statistical analysis (ANOVA).  $p < 0.05$  (\*, significant),  $p < 0.01$  (\*\*; highly significant),  $p < 0.001$  (\*\*\*; highly significant).

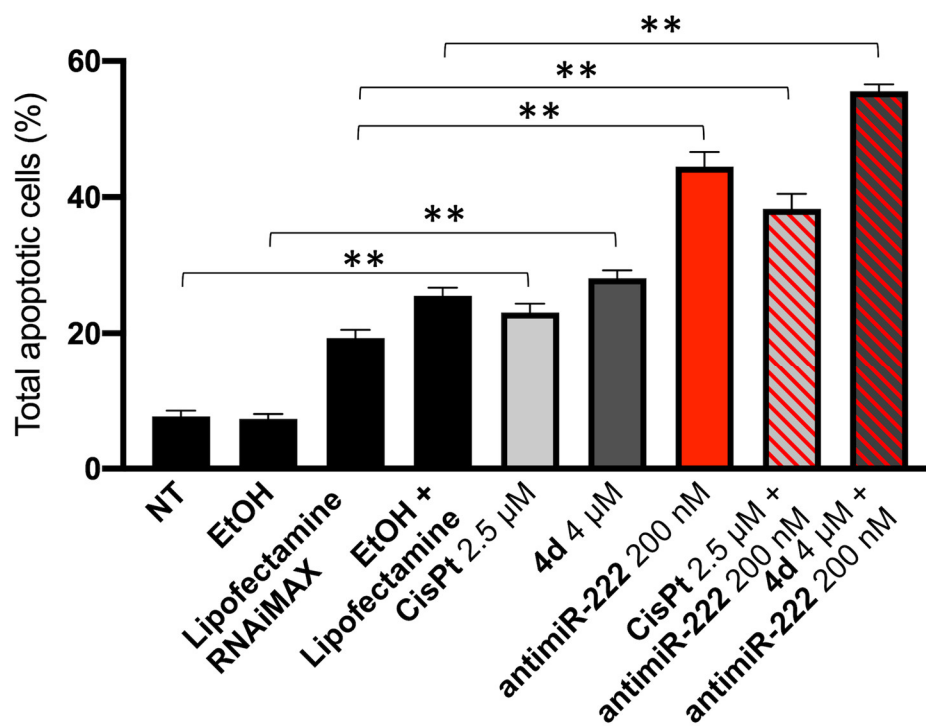

**Figure S7.** Total apoptotic cells percentage obtained from annexin-v staining after treatment of T98G cell line with CisPt and compound 4d in combination with antimir-222. Complete data set obtained from three different experiments, including each vehicle employed and showing comparisons evaluated for statistical analysis (ANOVA).  $p < 0.01$  (\*\*; highly significant).
